# Supplementary material for: The cholinesterase inhibitor donepezil has antidepressant-like properties in the mouse forced swim test
Source: PubMed Central journal article supplement (PMC7382650; doi:10.1038/s41398-020-00928-w), 2020-07-25
Supplement: 41398_2020_928_MOESM1_ESM.pdf [file 41398_2020_928_MOESM1_ESM.pdf]

|              | Principal question                                                                            | Drug groups    | Number of tests | Gap between tests |
|--------------|-----------------------------------------------------------------------------------------------|----------------|-----------------|-------------------|
| Experiment 1 | Does donepezil (Dpz) have antidepressant-like effects in the repeated FST?                    | Kept constant  | 6 FSTs          | 7 or 14 days      |
| Experiment 2 | Does crossing over the drug groups amplify antidepressant-like effects in the repeated FST?   | Crossed over   | 4 FSTs          | 7 or 14 days      |
| Experiment 3 | Can we replicate Expt 2 but with a slightly longer gap (17 days) to possibly amplify effects? | Crossed over   | 6 FSTs          | 7 or 17 days      |
| Experiment 4 | Is prior administration of Dpz necessary for antidepressant-like effects in subsequent swims? | Not applicable | 2 FSTs          | 7 days            |
| Experiment 5 | Are antidepressant-like effects of Dpz confounded by generalized hyperactivity in the OFT?    | Crossed over   | 2 OFTs, 2 FSTs  | 7 or 14 days      |
