# Supplementary material for: The cholinesterase inhibitor donepezil has antidepressant-like properties in the mouse forced swim test
Source: PubMed Central journal article supplement (PMC7382650; doi:10.1038/s41398-020-00928-w), 2020-07-25

# Immobile

- vehicle
- dpz 0.02 mg/kg
- dpz 0.2 mg/kg
- dpz 2.0 mg/kg

FST1 (Day 0):  
Dpz

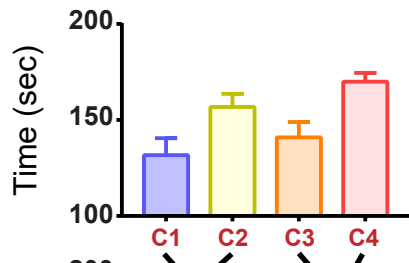

FST2 (Day 7):  
Dpz

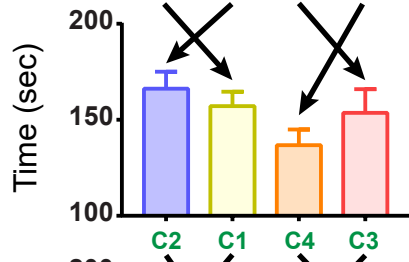

FST3 (Day 21):  
Dpz

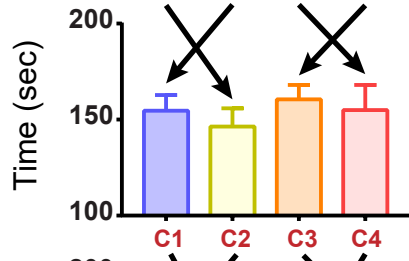

FST4 (Day 28):  
Dpz

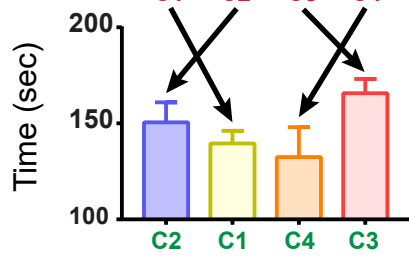

Supplement: 41398_2020_928_MOESM2_ESM.pdf [file 41398_2020_928_MOESM2_ESM.pdf]
